# Supplementary material for: Optimizing stretch-shortening cycle performance: effects of drop height and landing strategy on lower-limb biomechanics in drop jumps
Source: PeerJ. 2025 May 21;13:e19490. doi: 10.7717/peerj.19490 (PMC12103163; doi:10.7717/peerj.19490)
Supplement: Supplemental Information 1 — Raw data on physiology and SSC performance metrics recorded during drop jump tests, organized into multiple Excel worksheets. The ‘Physiology’ worksheet includes physiological data such as age, height, body mass, and body weight of the participants. Each of the following worksheets contains a different SSC performance metric: peak impact force, reactive strength index, leg stiffness, joint stiffness, joint angular displacement, change in joint moment, and joint work (negative, positive, and net). These metrics are categorized by drop heights (30 cm, 45 cm, 60 cm) and landing strategies (hip-dominant and knee-dominant). [file peerj-13-19490-s001.xlsx]

## Sheet: Physiology
No.	Name	Age(year)	Height(cm)	Body Mass(kg)	Body Weight(N)
1	***	23	169.4	75.6	741.636
2	***	23	177.6	71.7	703.377
3	***	26	173.5	73.8	723.978
4	***	24	160	51.3	503.253
5	***	20	180	69.6	682.776
6	***	23	176	76.4	749.484
7	***	26	181.5	82.8	812.268
8	***	24	173	74.1	726.921
9	***	23	171.9	83.9	823.059
10	***	28	173.5	84.9	832.869
11	***	25	170	75.4	739.674
12	***	23	180.5	82.4	808.344
13	***	21	169.9	66.3	650.403
14	***	23	188	108.9	1068.31
15	***	20	160.2	63.4	621.954
16	***	23	184.3	80.3	787.743
17	***	22	178.6	69.4	680.814
18	***	21	172.5	78.3	768.123

## Sheet: Peak impact force
No.	Name	Peak Impact Force (BW) [30cm, Hip-Dominant]	Peak Impact Force (BW) [30cm, Knee-Dominant]	Peak Impact Force (BW) [45cm, Hip-Dominant]	Peak Impact Force (BW) [45cm, Knee-Dominant]	Peak Impact Force (BW) [60cm, Hip-Dominant]	Peak Impact Force (BW) [60cm, Knee-Dominant]
1	***	2.17625	2.00431	2.91757	2.59304	3.0264	3.28286
2	***	1.24406	1.33668	1.48736	1.75817	2.00258	2.08955
3	***	1.88045	2.21317	3.01078	2.78429	3.71276	3.51054
4	***	1.23449	1.55275	1.39533	1.87015	1.96671	1.9881
5	***	1.75996	2.58847	3.03433	3.1294	3.18118	3.03982
6	***	1.26798	1.57675	1.31931	1.78828	1.82881	2.05453
7	***	1.69184	1.88987	2.56807	2.65007	3.20372	4.01049
8	***	1.77064	1.54101	1.73313	2.23859	2.34898	2.37329
9	***	1.16666	1.27862	1.59748	1.69854	2.63789	2.33536
10	***	1.80752	2.36832	1.99328	2.51999	2.99245	2.83799
11	***	1.91394	2.53477	1.80007	2.69868	2.44911	2.41617
12	***	1.80298	1.97298	2.16833	3.10104	2.08391	2.40162
13	***	1.33262	1.45744	1.9223	1.77709	2.6228	2.28264
14	***	2.12134	1.99397	2.54416	2.55745	3.11751	2.93439
15	***	1.70314	1.58632	2.5536	2.16993	2.51057	2.77653
16	***	1.60698	2.07101	2.36352	2.41947	2.66165	3.41111
17	***	1.76309	1.50537	1.88207	1.6068	2.86471	2.85152
18	***	1.21639	1.58488	1.67158	1.81858	2.42247	1.68315

## Sheet: Reactive strength index
No.	Name	Reactive strength index (m·s-1) [30cm, Hip-Dominant]	Reactive strength index (m·s-1) [30cm, Knee-Dominant]	Reactive strength index (m·s-1) [45cm, Hip-Dominant]	Reactive strength index (m·s-1) [45cm, Knee-Dominant]	Reactive strength index (m·s-1) [60cm, Hip-Dominant]	Reactive strength index (m·s-1) [60cm, Knee-Dominant]
1	***	0.90822	1.01298	0.919022	0.992964	0.817577	0.905803
2	***	0.544128	0.631372	0.600014	0.66097	0.551478	0.66969
3	***	0.595699	0.89168	0.609395	0.72667	0.624507	0.871008
4	***	0.587419	0.71808	0.568092	0.655633	0.560494	0.652419
5	***	0.835792	0.966033	0.919995	1.03367	0.962258	0.996796
6	***	0.990211	1.20603	0.872794	0.846732	0.888564	0.925439
7	***	0.573761	0.591001	0.551723	0.61792	0.5996	0.642858
8	***	0.686594	0.781463	0.631193	0.700969	0.68513	0.768905
9	***	0.500861	0.611356	0.511115	0.582635	0.51417	0.559549
10	***	0.456803	0.522323	0.508507	0.507869	0.443857	0.505015
11	***	0.622927	0.710112	0.560364	0.636848	0.583446	0.599612
12	***	0.789787	0.89021	0.610403	0.695409	0.658346	0.731679
13	***	0.816671	1.08527	0.73191	0.954907	0.731716	0.822934
14	***	0.642912	0.899841	0.556827	0.818762	0.486348	0.610589
15	***	0.498378	0.710141	0.449301	0.615681	0.468971	0.596229
16	***	0.828778	1.11252	0.72477	0.948311	0.703486	0.8144
17	***	0.633686	0.786663	0.576621	0.624291	0.501259	0.469505
18	***	0.883974	0.978151	0.791297	1.03821	0.846957	0.957214

## Sheet: Leg stiffness
No.	Name	Leg stiffness (BW·m-1) [30cm, Hip-Dominant]	Leg stiffness (BW·m-1) [30cm, Knee-Dominant]	Leg stiffness (BW·m-1) [45cm, Hip-Dominant]	Leg stiffness (BW·m-1) [45cm, Knee-Dominant]	Leg stiffness (BW·m-1) [60cm, Hip-Dominant]	Leg stiffness (BW·m-1) [60cm, Knee-Dominant]
1	***	7.44491	7.23737	6.03363	6.51793	5.18621	5.57777
2	***	3.19653	3.49724	3.43656	3.71228	3.23108	3.75695
3	***	5.034	7.9563	4.88676	6.04021	4.87522	6.44401
4	***	4.27154	5.10632	3.54998	4.46873	3.35382	4.01363
5	***	4.70001	4.94422	4.34083	4.79923	4.0379	4.20478
6	***	5.881	6.6755	4.89036	3.73261	4.36305	4.0016
7	***	2.80998	3.28942	3.27934	3.17088	3.54354	3.22728
8	***	3.76792	4.54536	3.66222	4.21185	4.20796	4.87625
9	***	3.8119	4.18258	4.01966	4.12546	4.08488	3.93795
10	***	3.98866	4.88336	4.54681	4.2428	3.26517	4.11268
11	***	4.07016	4.7544	3.47748	4.44582	3.52329	3.5109
12	***	6.30107	6.18781	5.21945	4.6728	4.90237	4.86591
13	***	4.78762	6.88133	4.92499	5.72335	4.9464	4.64582
14	***	7.60392	8.05819	5.50813	6.86961	4.89473	5.0523
15	***	5.29488	5.62852	4.77128	4.57034	4.15547	4.52863
16	***	7.1145	8.83744	6.27464	7.29868	5.61868	6.6996
17	***	4.64892	4.37428	4.12506	3.23907	3.62031	2.79023
18	***	5.99482	5.62953	5.84099	5.59473	4.99852	4.90641

## Sheet: Joint stiffness
No.	Name	Hip stiffness (Nm·kg-1·deg-1) [30cm, Hip-Dominant]	Hip stiffness (Nm·kg-1·deg-1) [30cm, Knee-Dominant]	Hip stiffness (Nm·kg-1·deg-1) [45cm, Hip-Dominant]	Hip stiffness (Nm·kg-1·deg-1) [45cm, Knee-Dominant]	Hip stiffness (Nm·kg-1·deg-1) [60cm, Hip-Dominant]	Hip stiffness (Nm·kg-1·deg-1) [60cm, Knee-Dominant]	Knee stiffness (Nm·kg-1·deg-1) [30cm, Hip-Dominant]	Knee stiffness (Nm·kg-1·deg-1) [30cm, Knee-Dominant]	Knee stiffness (Nm·kg-1·deg-1) [45cm, Hip-Dominant]	Knee stiffness (Nm·kg-1·deg-1) [45cm, Knee-Dominant]	Knee stiffness (Nm·kg-1·deg-1) [60cm, Hip-Dominant]	Knee stiffness (Nm·kg-1·deg-1) [60cm, Knee-Dominant]	Ankle stiffness (Nm·kg-1·deg-1) [30cm, Hip-Dominant]	Ankle stiffness (Nm·kg-1·deg-1) [30cm, Knee-Dominant]	Ankle stiffness (Nm·kg-1·deg-1) [45cm, Hip-Dominant]	Ankle stiffness (Nm·kg-1·deg-1) [45cm, Knee-Dominant]	Ankle stiffness (Nm·kg-1·deg-1) [60cm, Hip-Dominant]	Ankle stiffness (Nm·kg-1·deg-1) [60cm, Knee-Dominant]
1	***	0.0782526	0.072474	0.0847104	0.0573528	0.0840632	0.065667	0.0390568	0.0457054	0.0351332	0.0442576	0.0267156	0.0377388	0.030342	0.0343042	0.0237004	0.033971	0.022014	0.0326516
2	***	0.0322756	0.0286882	0.0390428	0.0296538	0.0341118	0.0321138	0.0160886	0.0267868	0.0172618	0.0336304	0.0163748	0.0324644	0.0076748	0.0185142	0.011349	0.0209102	0.0079846	0.024097
3	***	0.0618958	0.108518	0.0727152	0.0925094	0.079483	0.105457	0.0149782	0.0200486	0.0085068	0.0192602	0.013052	0.0216282	0.0506314	0.04934	0.027291	0.027656	0.0221754	0.0273386
4	***	0.0422502	0.0442608	0.035441	0.0433418	0.0341076	0.032564	0.014264	0.0299494	0.011596	0.0234098	0.0072928	0.0211422	0.0114834	0.0188642	0.0096524	0.0108248	0.0113596	0.0117984
5	***	0.0677122	0.0743584	0.0605096	0.065885	0.0641084	0.0649874	0.0176688	0.0255066	0.0187102	0.0290792	0.0141662	0.023942	0.0170732	0.0174958	0.016942	0.0222252	0.0158594	0.0183778
6	***	0.067493	0.086508	0.0497014	0.03489	0.0464178	0.0433234	0.0313568	0.0491094	0.0254326	0.0303598	0.023171	0.0246532	0.0221708	0.030427	0.0224778	0.0173568	0.0132372	0.0200518
7	***	0.0326272	0.0429422	0.0372328	0.0375708	0.0421184	0.0432204	0.0152866	0.0200414	0.0167032	0.0239148	0.0166868	0.0241826	0.0140828	0.0161386	0.0130172	0.015979	0.0124764	0.011395
8	***	0.0089454	0.0629666	0.0445188	0.0466998	0.0607236	0.066597	0.0212012	0.0345098	0.023082	0.033225	0.0237792	0.0387248	0.0142414	0.0268818	0.0150794	0.0201768	0.0104416	0.0284005
9	***	0.038176	0.0261352	0.0384764	0.0290564	0.0532722	0.0359496	0.013516	0.032252	0.0131784	0.030515	0.0030048	0.0249292	0.008198	0.016812	0.0095274	0.0138326	0.0149592	0.0156384
10	***	0.0544148	0.0667498	0.0651086	0.0601506	0.048104	0.055519	0.009135	0.0239256	0.0093208	0.0222106	0.0064872	0.0173843	0.025183	0.027107	0.0292516	0.0232848	0.0147014	0.0196592
11	***	0.0520048	0.057772	0.0403382	0.0555194	0.0439076	0.0422234	0.014064	0.0277928	0.0174552	0.0312634	0.0089626	0.0254796	0.0120046	0.0299218	0.01333	0.038234	0.0103908	0.0112972
12	***	0.0783612	0.0869452	0.051869	0.0618522	0.0596696	0.0626652	0.0135186	0.024745	0.0116568	0.0179858	0.0097462	0.02182	0.0209358	0.0308676	0.016694	0.0233094	0.0179154	0.0273386
13	***	0.0457986	0.0709122	0.0415374	0.0619388	0.04371	0.0492968	0.0198722	0.0592958	0.0178552	0.0426662	0.023239	0.031605	0.0203692	0.040114	0.0168296	0.0326366	0.015644	0.0233202
14	***	0.116843	0.132485	0.0846416	0.103632	0.0651096	0.0716732	0.0243504	0.0478388	0.0213776	0.0486152	0.0214468	0.037792	0.024663	0.0530974	0.0197856	0.0375388	0.016336	0.0258932
15	***	0.0466434	0.0503964	0.0416652	0.0422824	0.0387852	0.0408082	0.0155116	0.0370976	0.0150728	0.0337496	0.0130374	0.03439	0.0179556	0.0187814	0.0146938	0.0155392	0.0116214	0.0213256
16	***	0.101589	0.208218	0.0743468	0.12463	0.0875182	0.16711	0.023136	0.0484238	0.0106002	0.0368748	0.0012448	0.021754	0.0363496	0.0967688	0.0229744	0.0670146	0.0208942	0.077138
17	***	0.046442	0.056607	0.0381764	0.0393992	0.0400876	0.033012	0.0153356	0.0251773	0.0167004	0.0194032	0.0145818	0.0195946	0.0234898	0.01921	0.0126482	0.0140032	0.0098942	0.0122784
18	***	0.0737154	0.0661196	0.058478	0.0612902	0.060589	0.0629728	0.0136602	0.0381542	0.013219	0.0393472	0.010756	0.027483	0.0135714	0.0226082	0.0162324	0.023598	0.0127916	0.0262978

## Sheet:  joint angular displacement
No.	Name	Hip angular displacement (deg) [30cm, Hip-Dominant]	Hip angular displacement (deg) [30cm, Knee-Dominant]	Hip angular displacement (deg) [45cm, Hip-Dominant]	Hip angular displacement (deg) [45cm, Knee-Dominant]	Hip angular displacement (deg) [60cm, Hip-Dominant]	Hip angular displacement (deg) [60cm, Knee-Dominant]	Knee angular displacement (deg) [30cm, Hip-Dominant]	Knee angular displacement (deg) [30cm, Knee-Dominant]	Knee angular displacement (deg) [45cm, Hip-Dominant]	Knee angular displacement (deg) [45cm, Knee-Dominant]	Knee angular displacement (deg) [60cm, Hip-Dominant]	Knee angular displacement (deg) [60cm, Knee-Dominant]	Ankle angular displacement (deg) [30cm, Hip-Dominant]	Ankle angular displacement (deg) [30cm, Knee-Dominant]	Ankle angular displacement (deg) [45cm, Hip-Dominant]	Ankle angular displacement (deg) [45cm, Knee-Dominant]	Ankle angular displacement (deg) [60cm, Hip-Dominant]	Ankle angular displacement (deg) [60cm, Knee-Dominant]
1	***	29.0344	22.9199	28.8388	25.4049	36.4359	31.1088	53.8046	60.3475	54.3048	58.4716	63.4503	65.9664	25.3987	44.4899	32.9343	45.1327	38.6844	46.0443
2	***	66.7269	65.2504	60.7169	59.8204	60.7794	59.0855	80.1093	107.563	71.5718	96.3563	74.7067	97.6832	41.6323	48.5119	43.8105	54.6216	43.5634	52.7935
3	***	51.6777	30.7431	51.8014	40.1903	51.2578	30.466	61.4344	52.8562	62.0075	62.818	66.7062	61.1155	13.819	21.8497	26.4292	22.3726	29.0029	37.2324
4	***	51.5927	47.0549	57.9619	46.6385	57.1997	52.9721	76.6257	88.0164	78.0626	86.7787	76.1641	97.085	39.9894	44.1249	43.5938	44.1382	42.8855	46.8003
5	***	46.7465	43.7748	43.6687	42.3576	47.6823	46.804	69.7999	78.3731	74.1127	81.5291	71.9681	83.6921	51.6825	47.5069	55.8484	52.707	54.1144	55.2851
6	***	43.7054	27.5132	54.7471	46.8287	58.2469	54.796	58.4833	50.5843	68.5207	78.3717	73.0354	81.4887	38.2663	33.9931	42.6899	52.1384	49.1459	52.4602
7	***	54.9254	53.7058	47.3061	51.0262	47.2184	51.4465	70.3741	79.7208	57.3495	79.4333	65.6503	77.5012	46.9999	44.7591	45.0015	45.5773	47.18	42.6169
8	***	42.8777	38.5011	53.9225	48.0045	45.7809	43.1604	85.864	93.0195	101.797	99.4002	86.9026	99.7654	36.5084	47.0039	46.4405	44.2467	46.2348	35.12
9	***	61.8039	46.8537	64.1637	47.3377	57.9557	51.48	57.6589	70.0643	61.2581	74.1714	62.4398	78.2375	39.479	54.8934	42.1782	55.4209	44.3607	55.4039
10	***	54.0383	49.642	50.8763	46.822	56.6461	54.255	70.23	76.2043	66.8078	79.4263	69.3473	77.1108	31.4646	23.2715	30.616	34.5159	29.3397	32.4379
11	***	53.7835	46.8431	56.9168	50.9996	57.1843	58.5014	76.3091	84.8905	87.2986	87.7809	64.7294	97.3209	34.0241	24.6702	52.5839	25.7038	45.1785	48.8863
12	***	47.7959	41.1212	51.617	52.7326	55.6411	54.6264	56.4938	62.4261	52.3668	68.0981	58.8646	74.2351	43.4524	45.5263	44.2544	48.0854	45.2187	52.9712
13	***	51.8766	28.7654	50.5317	35.1294	47.1918	50.1259	56.2417	53.6241	51.2353	60.6465	57.5259	70.838	31.4449	24.795	41.9497	35.093	48.0615	50.7519
14	***	41.8716	30.9001	42.5874	34.833	44.0745	44.4255	48.2472	50.8127	50.8338	55.6708	51.749	67.1091	5.05437	23.3951	32.5362	36.3278	35.1175	42.2084
15	***	61.7744	44.6173	65.0331	48.0455	64.1584	53.8541	63.5541	74.2818	63.2067	75.5105	62.1936	82.039	44.4366	41.9674	42.7309	48.1545	44.2536	51.5745
16	***	33.5542	15.1668	42.9354	24.6227	46.4975	27.0352	45.7893	48.1028	47.2803	51.8476	49.4562	53.434	23.0759	15.1003	31.1619	16.5976	33.2528	15.3791
17	***	51.4082	39.7113	50.7048	56.8534	51.971	56.4302	59.7285	61.6815	55.4581	76.7351	62.2094	85.7907	45.2177	51.1859	46.5586	48.7027	47.0248	50.728
18	***	43.9562	41.4517	45.966	43.3451	49.7664	46.8674	66.8183	74.613	65.7698	79.2906	62.6262	82.987	51.2478	40.8699	54.0782	43.6753	46.3831	47.6551

## Sheet: change in joint moment
No.	Name	Change in hip moment (Nm/kg) [30cm, Hip-Dominant]	Change in hip moment (Nm/kg) [30cm, Knee-Dominant]	Change in hip moment (Nm/kg) [45cm, Hip-Dominant]	Change in hip moment (Nm/kg) [45cm, Knee-Dominant]	Change in hip moment (Nm/kg) [60cm, Hip-Dominant]	Change in hip moment (Nm/kg) [60cm, Knee-Dominant]	Change in knee moment (Nm/kg) [30cm, Hip-Dominant]	Change in knee moment (Nm/kg) [30cm, Knee-Dominant]	Change in knee moment (Nm/kg) [45cm, Hip-Dominant]	Change in knee moment (Nm/kg) [45cm, Knee-Dominant]	Change in knee moment (Nm/kg) [60cm, Hip-Dominant]	Change in knee moment (Nm/kg) [60cm, Knee-Dominant]	Change in ankle moment (Nm/kg) [30cm, Hip-Dominant]	Change in ankle moment (Nm/kg) [30cm, Knee-Dominant]	Change in ankle moment (Nm/kg) [45cm, Hip-Dominant]	Change in ankle moment (Nm/kg) [45cm, Knee-Dominant]	Change in ankle moment (Nm/kg) [60cm, Hip-Dominant]	Change in ankle moment (Nm/kg) [60cm, Knee-Dominant]
1	***	2.29353	1.61339	2.40662	1.44367	3.05992	2.01943	2.08088	2.66355	1.91198	2.56146	1.71531	2.48641	0.673207	1.50539	0.767174	1.53254	0.857053	1.50144
2	***	2.15488	1.84529	2.35268	1.77381	2.07859	1.89315	1.29005	2.85827	1.24091	3.23354	1.23822	3.18267	0.323402	0.893802	0.507698	1.14598	0.356429	1.26586
3	***	3.18359	3.20011	3.7198	3.69495	4.05366	3.20773	0.935895	1.05479	0.537856	1.2064	0.875737	1.32106	0.496417	1.00412	0.721344	0.629318	0.688222	1.00243
4	***	2.18025	2.03294	2.0489	2.00288	1.93576	1.71877	1.1312	2.60262	0.911926	2.018	0.56454	2.04625	0.461636	0.843881	0.438033	0.47817	0.483779	0.562075
5	***	3.17432	3.23162	2.60911	2.79052	3.05695	3.03233	1.23387	2.01176	1.39267	2.37214	1.04981	2.00367	0.875737	0.839358	0.949094	1.18427	0.854225	1.025
6	***	2.93341	2.21112	2.7313	1.61386	2.70498	2.37761	1.83351	2.44291	1.73813	2.38121	1.69964	2.01331	0.845759	1.05833	0.960899	0.91251	0.650461	1.04849
7	***	1.77293	2.29933	1.72004	1.90868	1.96543	2.22725	1.0804	1.59703	0.964299	1.90763	1.085	1.88215	0.662485	0.725822	0.579297	0.738021	0.57476	0.508608
8	***	0.253056	2.3932	2.3759	2.24219	2.77165	2.8888	1.79727	3.20665	2.37313	3.3249	2.0658	3.86773	0.465754	1.25967	0.702959	0.864367	0.498465	0.934661
9	***	2.32113	1.22484	2.45094	1.38182	3.08714	1.84892	0.779724	2.25933	0.802578	2.26397	0.210419	1.93762	0.324215	0.921625	0.405239	0.767481	0.662296	0.860924
10	***	2.92969	3.3097	3.27572	2.80998	2.71608	3.0095	0.655648	1.8297	0.626881	1.7651	0.457881	1.34128	0.799195	0.640733	0.906595	0.803867	0.454476	0.630341
11	***	2.79731	2.69012	2.30018	2.79337	2.50011	2.4714	1.08155	2.35046	1.53339	2.74808	0.582106	2.47796	0.219216	0.74295	0.701218	0.842535	0.467291	0.553812
12	***	3.72551	3.46903	2.67844	3.20852	3.34468	3.41486	0.775794	1.52667	0.61813	1.22208	0.569332	1.6264	0.911078	1.4025	0.7508	1.11449	0.809624	1.45295
13	***	2.35993	1.99042	2.09941	2.06527	2.06654	2.44065	1.11057	3.1685	0.925257	2.5769	1.33136	2.2449	0.627125	0.996882	0.718321	1.16579	0.758528	1.18371
14	***	4.88276	4.04595	3.60914	3.59925	2.87488	3.10321	1.20711	2.40504	1.10012	2.70268	1.10382	2.52226	0.63656	1.07994	0.649071	1.37042	0.613449	1.1029
15	***	2.87195	2.22021	2.68625	2.02455	2.47259	2.204	0.999982	2.7472	0.979418	2.54746	0.842476	2.82328	0.78913	0.781912	0.619637	0.763572	0.519351	1.10508
16	***	3.26529	3.05181	3.17083	3.03721	4.04983	4.39964	1.03572	2.31429	0.564264	1.89861	0.0802476	1.15356	0.82946	1.42416	0.691385	1.10982	0.724406	1.18996
17	***	2.35036	2.23837	1.97213	2.24627	2.04075	1.82713	0.938633	1.54941	0.931084	1.5133	0.911182	1.68242	1.03742	0.987779	0.588322	0.676245	0.4618	0.643197
18	***	3.22065	2.71715	2.68407	2.64661	3.00761	2.93985	0.93495	2.83167	0.888392	3.12452	0.741689	2.27836	0.694939	0.92552	0.871884	1.03525	0.604397	1.25598

## Sheet: Joint work
No.	Name	Negative hip work (J· kg-1) [30cm, Hip-Dominant]	Negative hip work (J· kg-1) [30cm, Knee-Dominant]	Negative hip work (J· kg-1) [45cm, Hip-Dominant]	Negative hip work (J· kg-1) [45cm, Knee-Dominant]	Negative hip work (J· kg-1) [60cm, Hip-Dominant]	Negative hip work (J· kg-1) [60cm, Knee-Dominant]	Negative knee work (J· kg-1) [30cm, Hip-Dominant]	Negative knee work (J· kg-1) [30cm, Knee-Dominant]	Negative knee work (J· kg-1) [45cm, Hip-Dominant]	Negative knee work (J· kg-1) [45cm, Knee-Dominant]	Negative knee work (J· kg-1) [60cm, Hip-Dominant]	Negative knee work (J· kg-1) [60cm, Knee-Dominant]	Negative ankle work (J· kg-1) [30cm, Hip-Dominant]	Negative ankle work (J· kg-1) [30cm, Knee-Dominant]	Negative ankle work (J· kg-1) [45cm, Hip-Dominant]	Negative ankle work (J· kg-1) [45cm, Knee-Dominant]	Negative ankle work (J· kg-1) [60cm, Hip-Dominant]	Negative ankle work (J· kg-1) [60cm, Knee-Dominant]	Positive hip work (J· kg-1) [30cm, Hip-Dominant]	Positive hip work (J· kg-1) [30cm, Knee-Dominant]	Positive hip work (J· kg-1) [45cm, Hip-Dominant]	Positive hip work (J· kg-1) [45cm, Knee-Dominant]	Positive hip work (J· kg-1) [60cm, Hip-Dominant]	Positive hip work (J· kg-1) [60cm, Knee-Dominant]	Positive knee work (J· kg-1) [30cm, Hip-Dominant]	Positive knee work (J· kg-1) [30cm, Knee-Dominant]	Positive knee work (J· kg-1) [45cm, Hip-Dominant]	Positive knee work (J· kg-1) [45cm, Knee-Dominant]	Positive knee work (J· kg-1) [60cm, Hip-Dominant]	Positive knee work (J· kg-1) [60cm, Knee-Dominant]	Positive ankle work (J· kg-1) [30cm, Hip-Dominant]	Positive ankle work (J· kg-1) [30cm, Knee-Dominant]	Positive ankle work (J· kg-1) [45cm, Hip-Dominant]	Positive ankle work (J· kg-1) [45cm, Knee-Dominant]	Positive ankle work (J· kg-1) [60cm, Hip-Dominant]	Positive ankle work (J· kg-1) [60cm, Knee-Dominant]	Net hip work (J· kg-1) [30cm, Hip-Dominant]	Net hip work (J· kg-1) [30cm, Knee-Dominant]	Net hip work (J· kg-1) [45cm, Hip-Dominant]	Net hip work (J· kg-1) [45cm, Knee-Dominant]	Net hip work (J· kg-1) [60cm, Hip-Dominant]	Net hip work (J· kg-1) [60cm, Knee-Dominant]	Net knee work (J· kg-1) [30cm, Hip-Dominant]	Net knee work (J· kg-1) [30cm, Knee-Dominant]	Net knee work (J· kg-1) [45cm, Hip-Dominant]	Net knee work (J· kg-1) [45cm, Knee-Dominant]	Net knee work (J· kg-1) [60cm, Hip-Dominant]	Net knee work (J· kg-1) [60cm, Knee-Dominant]
1	***	-0.313471	-0.172816	-0.352058	-0.240835	-0.471635	-0.377741	-1.44144	-1.75108	-1.74104	-1.99385	-1.99137	-2.30238	-0.197075	-0.624943	-0.328106	-0.709206	-0.510906	-0.690708	0.379022	0.183498	0.479343	0.241624	0.612328	0.32439	1.45195	1.49865	1.43548	1.53546	1.53034	1.68635	0.612659	0.891598	0.705431	0.834476	0.660571	0.807501	0.0583888	0.0050362	0.120897	-0.0005972	0.13925	-0.0563362	0.0153814	-0.247175	-0.302047	-0.452892	-0.459575	-0.613006
2	***	-0.71456	-0.53457	-0.915252	-0.618981	-0.93419	-0.717423	-1.04702	-1.9077	-1.22655	-2.19589	-1.39144	-2.66836	-0.329165	-0.408892	-0.471053	-0.512589	-0.427844	-0.514533	1.12135	0.827062	1.30658	0.898261	0.985749	0.874056	1.34651	2.14836	1.2661	2.07983	1.48458	2.19632	0.771763	0.814689	0.768902	0.857651	0.73148	0.852225	0.406256	0.292695	0.390648	0.278162	0.052591	0.156458	0.300207	0.242877	0.0398328	-0.115366	0.0940444	-0.474044
3	***	-0.912746	-0.488302	-0.85677	-0.658757	-0.957512	-0.515727	-1.13246	-1.06155	-1.08337	-1.29149	-1.24686	-1.35289	-0.0612516	-0.176711	-0.128844	-0.12845	-0.175129	-0.315375	1.30018	0.739054	1.27735	0.957439	1.20842	0.634348	1.21197	1.1159	1.09597	1.19151	1.16346	1.10724	0.439202	0.696847	0.468571	0.571777	0.46654	0.708022	0.389763	0.249566	0.429747	0.29825	0.251311	0.113293	0.0787248	0.0558006	0.01225	-0.100211	-0.083658	-0.244729
4	***	-0.703935	-0.565836	-0.836902	-0.635057	-0.948964	-0.800017	-1.03338	-1.72665	-1.04613	-1.56205	-1.27425	-2.14907	-0.20399	-0.263827	-0.271623	-0.219236	-0.329501	-0.309318	1.34379	0.932981	1.36232	1.10553	1.43433	1.07126	1.19081	1.73066	1.2232	1.56223	1.10723	1.84892	0.434587	0.5694	0.462982	0.496824	0.455256	0.482125	0.635579	0.361827	0.52498	0.465516	0.491413	0.267259	0.15841	0.0035654	0.177789	0.0008024	-0.16759	-0.300869
5	***	-0.918667	-0.92255	-1.03909	-1.0125	-1.05764	-1.09388	-1.23667	-1.92028	-1.66858	-2.28388	-1.98378	-2.51488	-0.696215	-0.414834	-0.877361	-0.536897	-0.808711	-0.680505	1.30742	1.28998	1.15407	1.10623	1.25843	1.18886	1.44422	1.80796	1.49119	1.88771	1.48718	1.84033	0.885508	1.00256	0.996395	1.05899	0.982431	1.06942	0.364141	0.355818	0.088361	0.087584	0.185132	0.0885192	0.210657	-0.109828	-0.17525	-0.392806	-0.495491	-0.674324
6	***	-1.00686	-0.480519	-1.11502	-0.540333	-1.06627	-0.708283	-0.974127	-1.66797	-1.29528	-2.54935	-1.89852	-2.76791	-0.465708	-0.469702	-0.503461	-0.510168	-0.540797	-0.529113	1.78751	1.10804	1.60235	0.894515	1.3398	1.05263	1.67624	2.17273	1.68207	2.52569	1.87986	2.26017	0.991858	1.18689	0.940607	1.04798	0.944312	1.02748	0.766823	0.619092	0.481518	0.352447	0.265661	0.340962	0.703655	0.505426	0.388333	-0.023122	-0.0173662	-0.506592
7	***	-0.929014	-0.688534	-0.846616	-0.550919	-0.888848	-0.899964	-1.33522	-2.09395	-1.19241	-2.26715	-1.50973	-2.42307	-0.516388	-0.408023	-0.613727	-0.449028	-0.770009	-0.435054	0.946448	0.784491	0.859039	0.724959	0.642331	0.684013	1.25466	1.43463	1.06857	1.6217	1.08865	1.54212	0.778347	0.803881	0.786206	0.819072	0.807948	0.76865	0.0082838	0.0942708	-0.0020904	0.173409	-0.264043	-0.21686	-0.0802742	-0.659389	-0.123714	-0.645631	-0.421252	-0.88287
8	***	-0.621344	-0.439638	-0.519401	-0.463476	-0.888055	-0.338701	-1.92367	-1.92427	-2.61832	-3.04511	-2.3353	-3.52455	-0.187418	-0.322311	-0.295942	-0.243978	-0.409856	-0.173869	1.31113	0.994031	1.20904	1.00682	1.32328	0.872789	1.86567	2.29544	2.11955	2.50814	1.94274	2.71972	0.870824	0.968746	0.803577	0.846967	0.740105	0.749877	0.68558	0.551479	0.689507	0.542728	0.434369	0.534143	-0.055585	0.370011	-0.497725	-0.538526	-0.39085	-0.803934
9	***	-0.54515	-0.190162	-0.491181	-0.137242	-0.392034	-0.262644	-1.20878	-1.76008	-1.50829	-2.29426	-2.02563	-2.58773	-0.37266	-0.569131	-0.481534	-0.521357	-0.618406	-0.569828	0.901882	0.377296	0.692567	0.216826	0.555393	0.315231	1.34516	1.74722	1.43986	1.96239	1.38826	1.87542	0.58668	0.807229	0.566276	0.71851	0.654097	0.739423	0.356495	0.187325	0.19432	0.0802452	0.155527	0.0538654	0.136695	-0.0133202	-0.0674974	-0.332734	-0.637327	-0.714842
10	***	-1.17779	-0.830108	-0.792271	-0.78154	-0.817608	-0.733602	-0.792283	-1.60366	-0.881859	-1.57687	-1.26	-1.65085	-0.385552	-0.182158	-0.425064	-0.389955	-0.404368	-0.353023	1.2197	0.785306	0.753566	0.741152	0.730195	0.771278	1.0535	1.46557	0.961181	1.32771	1.0909	1.24339	0.536985	0.546579	0.562776	0.608	0.552646	0.606425	0.0380312	-0.0434066	-0.033958	-0.0369194	-0.0821592	0.0443653	0.261702	-0.137773	0.0796476	-0.247609	-0.169426	-0.407353
11	***	-0.959592	-0.743633	-0.895219	-0.96318	-0.895219	-0.845951	-1.09095	-1.91698	-1.42112	-2.27826	-1.42112	-2.31862	-0.280954	-0.100465	-0.613404	-0.184011	-0.613404	-0.380527	1.01115	0.800265	0.83766	0.844035	0.83766	0.841952	1.20693	1.64654	1.42704	1.92768	1.42704	1.9259	0.693371	0.790571	0.668675	0.692732	0.668675	0.656398	0.0433596	0.0547094	-0.064008	-0.118484	-0.064008	-0.0047486	0.117706	-0.270495	0.0071768	-0.348149	0.0071768	-0.388682
12	***	-1.08967	-0.67082	-1.03876	-1.13281	-1.16702	-1.15242	-0.743193	-1.22151	-0.788063	-1.23697	-0.985224	-1.45755	-0.434499	-0.414811	-0.551346	-0.387093	-0.654565	-0.643059	1.23941	1.10525	1.06145	1.15154	1.04838	1.0949	1.12536	1.29139	0.924227	1.43622	1.08445	1.47955	0.78322	0.970424	0.768091	0.838815	0.735434	0.841083	0.154727	0.422322	0.028319	0.0110632	-0.100736	-0.0615916	0.382787	0.0702504	0.135725	0.202428	0.0987306	0.022245
13	***	-0.641534	-0.201598	-0.491701	-0.385678	-0.480422	-0.620743	-1.02108	-1.52124	-1.05944	-1.95399	-1.43668	-2.36484	-0.229972	-0.180929	-0.454282	-0.362705	-0.53804	-0.513372	1.29353	0.861535	1.01282	0.924733	0.738703	0.989175	1.19051	2.02888	1.19508	1.83808	1.44247	1.90401	0.81574	0.966425	0.78907	0.91369	0.821797	0.843466	0.652788	0.657812	0.502281	0.53725	0.230623	0.366785	0.17004	0.507985	0.138153	-0.115601	0.0103934	-0.459522
14	***	-1.11438	-0.929843	-0.94797	-0.928021	-1.13181	-1.07823	-1.4457	-1.76322	-1.52904	-2.17893	-1.81936	-2.51983	-0.0587298	-0.17425	-0.379301	-0.326106	-0.487985	-0.430053	1.07717	0.991701	0.815391	0.874951	0.73543	0.863009	1.2851	1.61247	1.32218	1.60709	1.25372	1.68275	0.446478	0.703016	0.532772	0.728669	0.522813	0.674942	-0.0333094	0.0554936	-0.13431	-0.0582992	-0.377069	-0.213645	-0.15842	-0.145978	-0.206628	-0.569921	-0.566155	-0.836404
15	***	-0.940468	-0.454282	-0.990096	-0.713483	-0.907751	-0.815828	-1.19301	-2.03423	-1.46819	-2.16718	-1.75066	-2.68157	-0.406909	-0.192709	-0.513857	-0.35435	-0.647513	-0.375777	1.08403	0.523235	1.09495	0.562666	1.03185	0.605225	0.830898	1.69698	0.947775	1.77062	0.973712	1.88324	0.635908	0.887043	0.522481	0.824111	0.5384	0.856305	0.137287	0.0633546	0.103859	-0.154224	0.129675	-0.21442	-0.360742	-0.336187	-0.518888	-0.395117	-0.777525	-0.7986
16	***	-0.684058	-0.439926	-0.777962	-0.746129	-0.947544	-0.871731	-0.607875	-1.3047	-0.703016	-1.39253	-1.09433	-1.64345	-0.141132	-0.205044	-0.215302	-0.176744	-0.31245	-0.183815	1.30617	0.690186	1.05765	0.912867	1.26355	0.763216	0.999115	1.61126	0.79537	1.55606	0.78188	1.45624	0.466923	0.673803	0.433253	0.527842	0.469938	0.374493	0.618504	0.244012	0.278851	0.163068	0.327502	-0.111917	0.391078	0.303756	0.0928052	0.163284	-0.313335	-0.189433
17	***	-0.824243	-0.668662	-0.817222	-1.03341	-0.85147	-0.791437	-1.09242	-1.254	-1.05523	-1.62889	-1.54062	-2.07938	-0.692801	-0.619611	-0.788543	-0.716652	-0.813717	-0.603098	1.08229	0.945145	0.74049	0.988096	0.778447	0.619516	1.1661	1.54484	1.13286	1.71525	1.26235	1.74426	0.907813	1.05618	0.818567	0.88708	0.801925	0.780173	0.231687	0.266643	-0.103728	-0.048119	-0.0944786	-0.167619	0.0748956	0.29249	0.079768	0.0871106	-0.27632	-0.336261
18	***	-0.840389	-0.612061	-1.03558	-0.64406	-1.19802	-0.700467	-0.338933	-1.53766	-0.35188	-1.84234	-0.948805	-1.96859	-0.586073	-0.37696	-0.815084	-0.432178	-0.670621	-0.650575	1.4637	1.04946	1.20743	1.01453	1.15373	0.938232	1.26604	2.03775	1.22486	2.17422	1.46214	2.22879	0.800531	0.887054	0.801422	0.888269	0.717101	0.891977	0.595557	0.430665	0.134651	0.364519	-0.0669928	0.234657	0.931019	0.50369	0.876723	0.33394	0.517209	0.260894
[truncated: 6 more columns]
